# Supplementary material for: Ages and transit times as important diagnostics of model performance for predicting carbon dynamics in terrestrial vegetation models
Source: Copernicus journal article supplement (doi:10.5194/bg-15-1607-2018), 2018-03-16
Supplement: Supplementary file 2 [file bg-15-1607-2018-supplement.zip]

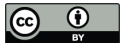

## *Supplement of*

# **Ages and transit times as important diagnostics of model performance for predicting carbon dynamics in terrestrial vegetation models**

**V. Ceballos-Nú et al.**

*Correspondence to:* Carlos A. Sierra ([csierra@bgc-jena.mpg.de](mailto:csierra@bgc-jena.mpg.de))

- [bg-15-1607-2018-supplement-title-page.pdf](#)
- [Ceballos2017Biogeosciences\\_Supp](#)
  - [AMF\\_US-Ha1\\_BIF\\_LATEST.csv](#)
  - [LMA.csv](#)
  - [Structures.pdf](#)
  - [StructuresSamePars.pdf](#)
  - [lai\\_98\\_15.csv](#)

The copyright of individual parts of the supplement might differ from the CC BY 4.0 License.
